# Supplementary material for: Reanalyses of Maskelyne's tidal data at St. Helena in 1761
Source: Copernicus journal article supplement (doi:10.5194/essd-14-4387-2022), 2022-09-26
Supplement: Supplementary file 1 [file essd-14-4387-2022-supplement.pdf]

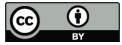

*Supplement of*

## **Reanalyses of Maskelyne’s tidal data at St. Helena in 1761**

**Philip L. Woodworth and John M. Vassie**

*Correspondence to:* Philip L. Woodworth (plw@noc.ac.uk)

The copyright of individual parts of the supplement might differ from the article licence.

The 62 harmonic constants in the STHL4 set mentioned in the text are listed below. Column 1 shows the constant name, 2 its speed in degrees per hour, 3 its amplitude (mbar) and 4 its Greenwich phase lag (deg). As discussed in the text, a new set called STHL4.X was defined which is identical to STHL4 except for the S1 and S2 constituents, the amplitudes and phase lags of which are shown in columns 5 and 6 respectively.

|      |            |         |         |       |         |
|------|------------|---------|---------|-------|---------|
| SA   | 0.0410686  | 3.2637  | 73.501  |       |         |
| SSA  | 0.0821373  | 1.4702  | 18.099  |       |         |
| MM   | 0.5443747  | 0.6851  | 345.755 |       |         |
| MSF  | 1.0158958  | 0.2608  | 350.889 |       |         |
| MF   | 1.0980331  | 1.1299  | 348.557 |       |         |
| 2Q1  | 12.8542862 | 0.2622  | 109.550 |       |         |
| SIG1 | 12.9271398 | 0.1621  | 92.274  |       |         |
| Q1   | 13.3986609 | 0.9427  | 153.027 |       |         |
| RO1  | 13.4715145 | 0.0590  | 194.631 |       |         |
| O1   | 13.9430356 | 2.0773  | 190.651 |       |         |
| MP1  | 14.0251729 | 0.0445  | 15.476  |       |         |
| M1   | 14.4920521 | 0.3073  | 20.107  |       |         |
| CHI1 | 14.5695476 | 0.0506  | 217.138 |       |         |
| PI1  | 14.9178647 | 0.0951  | 347.329 |       |         |
| P1   | 14.9589314 | 0.8959  | 337.644 |       |         |
| S1   | 15.0000000 | 0.2564  | 242.973 | 0.14  | 124.790 |
| K1   | 15.0410686 | 3.4612  | 349.220 |       |         |
| PSI1 | 15.0821353 | 0.1093  | 354.465 |       |         |
| PHI1 | 15.1232059 | 0.0506  | 301.796 |       |         |
| TH1  | 15.5125897 | 0.0631  | 340.630 |       |         |
| J1   | 15.5854433 | 0.2601  | 48.329  |       |         |
| SO1  | 16.0569644 | 0.0400  | 139.560 |       |         |
| OO1  | 16.1391017 | 0.2489  | 90.082  |       |         |
| OQ2  | 27.3416965 | 0.2426  | 348.129 |       |         |
| MNS2 | 27.4238337 | 0.2823  | 47.716  |       |         |
| 2N2  | 27.8953548 | 1.0208  | 65.219  |       |         |
| MU2  | 27.9682084 | 1.3598  | 54.676  |       |         |
| N2   | 28.4397295 | 6.6857  | 70.878  |       |         |
| NU2  | 28.5125831 | 1.1622  | 75.607  |       |         |
| OP2  | 28.9019669 | 0.1307  | 203.162 |       |         |
| M2   | 28.9841042 | 32.4879 | 80.037  |       |         |
| MKS2 | 29.0662415 | 0.0529  | 271.982 |       |         |
| LAM2 | 29.4556253 | 0.2252  | 84.372  |       |         |
| L2   | 29.5284789 | 0.7761  | 86.755  |       |         |
| T2   | 29.9589333 | 0.5066  | 86.417  |       |         |
| S2   | 30.0000000 | 10.2463 | 100.309 | 11.39 | 101.960 |
| R2   | 30.0410667 | 0.0240  | 316.031 |       |         |
| K2   | 30.0821373 | 3.0370  | 96.328  |       |         |
| MSN2 | 30.5443747 | 0.0501  | 239.842 |       |         |
| KJ2  | 30.6265120 | 0.2393  | 263.243 |       |         |
| 2SM2 | 31.0158958 | 0.0494  | 22.262  |       |         |
| MO3  | 42.9271398 | 0.0654  | 247.447 |       |         |
| M3   | 43.4761563 | 0.1835  | 75.225  |       |         |

|      |            |        |         |
|------|------------|--------|---------|
| SO3  | 43.9430356 | 0.0176 | 45.777  |
| MK3  | 44.0251729 | 0.0561 | 38.551  |
| SK3  | 45.0410686 | 0.1279 | 227.946 |
| MN4  | 57.4238337 | 0.1904 | 76.393  |
| M4   | 57.9682084 | 0.2675 | 140.722 |
| SN4  | 58.4397295 | 0.0612 | 28.755  |
| MS4  | 58.9841042 | 0.0431 | 54.035  |
| MK4  | 59.0662415 | 0.0541 | 227.005 |
| S4   | 60.0000000 | 0.0817 | 246.724 |
| SK4  | 60.0821373 | 0.0939 | 241.574 |
| 2MN6 | 86.4079380 | 0.0554 | 110.816 |
| M6   | 86.9523127 | 0.0819 | 193.189 |
| MSN6 | 87.4238337 | 0.0108 | 209.837 |
| 2MS6 | 87.9682084 | 0.0452 | 291.985 |
| 2MK6 | 88.0503457 | 0.0457 | 260.163 |
| 2SM6 | 88.9841042 | 0.0268 | 354.878 |
| MSK6 | 89.0662415 | 0.0299 | 30.009  |
| MA2  | 28.9430356 | 0.1671 | 42.176  |
| MB2  | 29.0251728 | 0.1476 | 17.001  |

The 62 harmonic constants in the STHL2 set mentioned in the text are listed below. Column 1 shows the constant name, 2 its speed in degrees per hour, 3 its amplitude (mbar) and 4 its Greenwich phase lag (deg). (A slightly different format from STHL4 as the list derives from different software.)

|      |            |        |        |
|------|------------|--------|--------|
| Sa   | 0.0410686  | 3.736  | 35.91  |
| SSa  | 0.0821373  | 1.429  | 63.08  |
| Mm   | 0.5443747  | 0.622  | 344.95 |
| MSf  | 1.0158958  | 0.219  | 228.03 |
| Mf   | 1.0980331  | 1.540  | 359.61 |
| 2Q1  | 12.8542862 | 0.153  | 104.36 |
| Sig1 | 12.9271398 | 0.189  | 120.12 |
| Q1   | 13.3986609 | 0.851  | 136.83 |
| Ro1  | 13.4715145 | 0.150  | 167.54 |
| O1   | 13.9430356 | 2.026  | 187.89 |
| MP1  | 14.0251729 | 0.071  | 325.78 |
| M1   | 14.4920521 | 0.210  | 281.79 |
| Chi1 | 14.5695476 | 0.011  | 7.06   |
| Pi1  | 14.9178647 | 0.058  | 332.62 |
| P1   | 14.9589314 | 0.894  | 336.86 |
| S1   | 15.0000000 | 0.324  | 250.20 |
| K1   | 15.0410686 | 3.488  | 349.71 |
| Psi1 | 15.0821353 | 0.066  | 61.32  |
| Phi1 | 15.1232059 | 0.069  | 18.96  |
| Th1  | 15.5125897 | 0.097  | 48.39  |
| J1   | 15.5854433 | 0.226  | 36.67  |
| SO1  | 16.0569644 | 0.065  | 146.10 |
| OO1  | 16.1391017 | 0.332  | 85.60  |
| OQ2  | 27.3416964 | 0.153  | 126.80 |
| MNS2 | 27.4238337 | 0.321  | 42.43  |
| 2N2  | 27.8953548 | 1.071  | 58.79  |
| Mu2  | 27.9682084 | 1.310  | 52.34  |
| N2   | 28.4397295 | 6.665  | 70.87  |
| Nu2  | 28.5125831 | 1.151  | 72.64  |
| OP2  | 28.9019669 | 0.078  | 46.29  |
| M2   | 28.9841041 | 32.365 | 79.92  |
| MKS2 | 29.0662415 | 0.439  | 107.02 |

|      |            |        |        |
|------|------------|--------|--------|
| Lam2 | 29.4556253 | 0.130  | 44.24  |
| L2   | 29.5284788 | 0.639  | 80.87  |
| T2   | 29.9589333 | 0.441  | 82.35  |
| S2   | 30.0000000 | 10.406 | 99.57  |
| R2   | 30.0410667 | 0.103  | 323.67 |
| K2   | 30.0821372 | 3.097  | 94.82  |
| MSN2 | 30.5443747 | 0.034  | 292.73 |
| KJ2  | 30.6265120 | 0.172  | 288.06 |
| 2SM2 | 31.0158958 | 0.040  | 198.35 |
| MO3  | 42.9271397 | 0.069  | 302.51 |
| M3   | 43.4761563 | 0.182  | 77.43  |
| SO3  | 43.9430356 | 0.046  | 358.58 |
| MK3  | 44.0251729 | 0.052  | 18.98  |
| SK3  | 45.0410686 | 0.113  | 220.82 |
| MN4  | 57.4238339 | 0.149  | 83.76  |
| M4   | 57.9682085 | 0.291  | 143.79 |
| SN4  | 58.4397293 | 0.004  | 355.97 |
| MS4  | 58.9841039 | 0.077  | 55.65  |
| MK4  | 59.0662414 | 0.061  | 67.27  |
| S4   | 59.9999999 | 0.081  | 229.59 |
| SK4  | 60.0821374 | 0.088  | 239.77 |
| 2MN6 | 86.4079381 | 0.035  | 114.79 |
| M6   | 86.9523128 | 0.042  | 211.27 |
| MSN6 | 87.4238335 | 0.023  | 200.67 |
| 2MS6 | 87.9682082 | 0.072  | 301.54 |
| 2MK6 | 88.0503457 | 0.017  | 282.11 |
| 2SM6 | 88.9841042 | 0.028  | 55.44  |
| MSK6 | 89.0662417 | 0.008  | 247.56 |
| Ma2  | 28.9430375 | 0.079  | 265.66 |
| Mb2  | 29.0251709 | 0.503  | 347.60 |
